# Supplementary material
Source: PubMed Central journal article supplement (PMC6130818)
Supplement: NIHMS78219-supplement-2.pdf [file NIHMS78219-supplement-2.pdf]

## Supplementary Tables

Supplementary Table 1 | Demographic and disease characteristics of BriTROC-1 patients

| Characteristic                                       | Platinum-sensitive<br>(N=109) | Platinum-resistant<br>(N=33) | Total<br>(N=142) |
|------------------------------------------------------|-------------------------------|------------------------------|------------------|
| Median age (range), years                            | 70 (37–90)                    | 67 (25–83)                   | 69.5 (25–90)     |
| Median time since diagnosis (range), months          | 33.5 (10.2–127.9)             | 27.3 (7.6–184.2)             | 32.5 (7.6–184.2) |
| Germline <i>BRCA1/2</i> mutation, N (%) <sup>*</sup> |                               |                              |                  |
| <i>BRCA1</i>                                         | 5 (4.6)                       | 1 (3.0)                      | 6 (4.2)          |
| <i>BRCA2</i>                                         | 4 (3.7)                       | 5 (15.2)                     | 9 (6.3)          |
| Histology, N (%)                                     |                               |                              |                  |
| High grade serous                                    | 105 (96.3)                    | 33 (100)                     | 138 (97.2)       |
| G3 Endometrioid                                      | 3 (2.8)                       | 0                            | 3 (2.1)          |
| Missing                                              | 1 (0.9)                       | 0                            | 1 (0.7)          |
| Number of prior treatment regimens                   |                               |                              |                  |
| Median number of regimens (range)                    | 1 (1–5)                       | 2 (1–12)                     | 1 (1–12)         |
| 1, N (%)                                             | 72 (66.1)                     | 11 (33.3)                    | 83 (58.5)        |
| 2, N (%)                                             | 28 (25.7)                     | 15 (45.5)                    | 43 (30.3)        |
| 3, N (%)                                             | 6 (5.5)                       | 1 (3.0)                      | 7 (4.9)          |
| >3, N (%)                                            | 2 (1.8)                       | 6 (18.1)                     | 8 (5.6)          |
| Data missing                                         | 1 (1.2)                       | 0                            | 1 (0.7)          |

<sup>\*</sup> Mutation status as recorded at time of study entry.

Supplementary Table 2 | Correlations of CN signature components across three sample sets

|                  | CN signature 1 | CN signature 2 | CN signature 3 | CN signature 4 | CN signature 5 | CN signature 6 | CN signature 7 |
|------------------|----------------|----------------|----------------|----------------|----------------|----------------|----------------|
| ICGC correlation | 0.78           | 0.91           | 0.95           | 0.88           | 0.93           | 0.73           | 0.84           |
| ICGC p-value     | 1.00E-43       | 6.00E-15       | 3.00E-21       | 2.00E-15       | 5.00E-26       | 9.00E-05       | 2.00E-09       |
| TCGA correlation | 0.73           | 0.84           | 0.89           | 0.93           | 0.71           | 0.56           | 0.92           |
| TCGA p-value     | 5.00E-41       | 8.00E-14       | 4.00E-15       | 3.00E-11       | 1.00E-08       | 3.00E-08       | 1.00E-21       |

Supplementary Table 3 | Means of CN signature components

| <b>Component</b> | <b>Mean</b> | <b>SD</b>  |
|------------------|-------------|------------|
| bp1              | 6.47E-05    | NA         |
| bp2              | 1.25529082  | NA         |
| bp3              | 4.07458306  | NA         |
| cn1              | 0.99799839  | 0.10280125 |
| cn2              | 1.98135508  | 0.12149214 |
| cn3              | 2.56168152  | 1.00230467 |
| cn4              | 2.99108879  | 0.1440896  |
| cn5              | 3.97051928  | 0.17145688 |
| cn6              | 4.27164691  | 1.58429331 |
| cn7              | 8.39260927  | 3.50149434 |
| cn8              | 30.8672269  | 23.15811   |
| cp1              | 0.49452648  | 0.15645341 |
| cp2              | 0.96834666  | 0.15629395 |
| cp3              | 1.17859816  | 0.22669911 |
| cp4              | 1.82240751  | 0.39907792 |
| cp5              | 3.00685766  | 1.03958107 |
| cp6              | 7.3149416   | 3.45921997 |
| cp7              | 28.7346654  | 22.0551593 |
| ct1              | 0.06154321  | NA         |
| ct2              | 2.62256735  | NA         |
| ct3              | 7.77720192  | NA         |
| ct4              | 17.5464903  | NA         |
| ct5              | 33.5306827  | NA         |
| os1              | 0.33948439  | NA         |
| os2              | 2.62714528  | NA         |
| os3              | 9.58714514  | NA         |
| ss1              | 426861.918  | 186924.872 |
| ss2              | 1081858.4   | 407302.128 |
| ss3              | 2233029.82  | 749092.036 |
| ss4              | 4303321.09  | 1115831.53 |
| ss5              | 7304340.04  | 1644306.83 |
| ss6              | 10479327.2  | 2972413.84 |
| ss7              | 16419124.1  | 5226151.49 |
| ss8              | 29508322.4  | 9703791.44 |
| ss9              | 58638899    | 20499001.4 |
| ss10             | 118310989   | 45210595   |

Supplementary Table 4 | SNVs in BriTROC-1, PCAWG-OV and TCGA samples

**As a separate excel file**

Supplementary Table 5 | Amplifications and deletions in BriTROC-1, PCAWG-OV and TCGA samples

**As a separate excel file**

Supplementary Table 6 | Differences in CN signature exposures for the selected genes

| <b>Gene</b>  | <b>CN signature</b> | <b>Median difference</b> | <b>p-value</b> | <b>Adjusted p-value</b> |
|--------------|---------------------|--------------------------|----------------|-------------------------|
| <i>NF1</i>   | s1                  | 0.26217944               | 0.00434335     | 0.03040345              |
| <i>BRCA1</i> | s3                  | 0.20048675               | 0.00899089     | 0.04495445              |
| <i>BRCA2</i> | s3                  | 0.24255108               | 0.00542057     | 0.03252342              |
| <i>CDK12</i> | s2                  | 0.11998113               | 0.0002275      | 0.00204746              |
| <i>CDK12</i> | s4                  | 0.17920597               | 8.69E-05       | 0.00086864              |
| <i>CCNE1</i> | s4                  | 0.08524036               | 1.76E-11       | 2.12E-10                |
| <i>CCNE1</i> | s6                  | 0.17989992               | 7.39E-27       | 1.03E-25                |
| <i>PTEN</i>  | s3                  | 0.3382558                | 0.0002489      | 0.00204746              |
| <i>MYC</i>   | s4                  | 0.10009799               | 7.17E-13       | 9.32E-12                |
| <i>MYC</i>   | s7                  | 0.08059432               | 9.70E-08       | 1.07E-06                |

Supplementary Table 7 | Differences in CN signature exposures for the selected 9 pathways

| Type          | Signature | Mean difference | p-value   | q-value    | Description                                       | Gene ID                                                                                                                                                                  |
|---------------|-----------|-----------------|-----------|------------|---------------------------------------------------|--------------------------------------------------------------------------------------------------------------------------------------------------------------------------|
| R-HSA-5658442 | 1         | 0.25038405      | 7.88E-06  | 9.21E-06   | RAS signaling                                     | <i>NF1/KRAS/RASA1/RASA2/CUL3/NRAS</i>                                                                                                                                    |
| R-HSA-5685942 | 3         | 0.21108933      | 0.0010908 | 0.00118685 | HDR through Homologous Recombination (HRR)        | <i>BARD1/PALB2/BRCA1/ATR/BLM/ATM/NBN/MRE11/BRCA2</i>                                                                                                                     |
| R-HSA-168164  | 4         | 0.12397634      | 1.99E-08  | 2.75E-08   | Toll-Like Receptor Cascades                       | <i>PPP2R1A/JUN/MAP2K4/IRF7/IKBKB/CUL1/MEF2C/DHX9/ATF1</i>                                                                                                                |
| R-HSA-69202   | 6         | 0.12701651      | 5.00E-32  | 1.24E-30   | Cyclin E associated events during G1/S transition | <i>MYC/CCNE1/AKT2/RB1/CCND1/CDK4/CDK2/CUL1</i>                                                                                                                           |
| R-HSA-2559583 | 6         | 0.14745787      | 2.83E-30  | 5.44E-29   | Cellular Senescence                               | <i>TP53/CDK6/CCNE1/RB1/JUN/MDM2/HIST1H3B/MAP2K4/CDK4/MDM4/CDK2/CDKN2A/CDKN2B/HIST1H3F/CDC27/ATM/TFDP1/HIST1H3I/NBN/MRE11/POT1/CDKN2C/STAT3</i>                           |
| R-HSA-2219528 | 6         | 0.17711275      | 1.74E-28  | 2.31E-27   | PI3K/AKT Signaling in Cancer                      | <i>PIK3CA/EGFR/MET/RICTOR/FGFR4/AKT2/FGFR1/MDM2/FRS2/ERBB2/HGF/FGFR2/FGF3/FGF4/PDK1/IRS2/PDGFR/FGFR3/KIT/ERBB4/PIK3R1/PIK3CB/PIK3R2</i>                                  |
| R-HSA-69231   | 6         | 0.15513127      | 2.70E-21  | 1.42E-20   | Cyclin D associated events in G1                  | <i>CDK6/CCND3/PPP2R1A/RB1/CCND2/CCND1/CDK4/CDKN2A/CDKN2B/TFDP1/CUL1/CDKN2C</i>                                                                                           |
| R-HSA-6785807 | 7         | 0.12578358      | 5.23E-19  | 2.26E-18   | Interleukin-4 and 13 signaling                    | <i>TP53/JAK2/MYC/SOX2/BCL2/HGF/CCND1/HSP90AA1/JAK3/STAT6/PIK3R1/VIM/MMP2/STAT3</i>                                                                                       |
| R-HSA-195721  | 7         | 0.12631054      | 3.31E-18  | 1.36E-17   | Signaling by Wnt                                  | <i>MYC/SOX2/TERT/AKT2/PPP2R1A/HIST1H3B/SMARCA4/CREBBP/KMT2D/CTNNB1/HIST1H3F/AXIN1/AXIN2/TRRAP/APC/CUL3/RNF43/CHD8/HIST1H3I/CUL1/CDC73/CSNK2A1/EP300/RHOA/LRP6/TCF7L2</i> |

Supplementary Table 8 | Summary of mutated cases by gene in each pathway

**As a separate excel file**



Supplementary Table 9 | Cox proportional hazards model

| <b>CN signature</b> | <b>HR</b> | <b>Lower</b> | <b>Higher</b> | <b>P value</b> |
|---------------------|-----------|--------------|---------------|----------------|
| s1                  | 1.15      | 1.06         | 1.25          | 0.001          |
| s2                  | 1.12      | 1.01         | 1.23          | 0.029          |
| s3                  | 0.91      | 0.83         | 1             | 0.049          |
| s4                  | 1         | 0.91         | 1.1           | 0.97           |
| s6                  | 1.01      | 0.93         | 1.1           | 0.734          |
| s7                  | 0.88      | 0.81         | 0.97          | 0.006          |

Supplementary Table 10 | Difference in CN signature exposures of platinum sensitive vs. resistant cases

| <b>CN signature</b> | <b>term</b>        | <b>estimate</b> | <b>Standard error</b> | <b>statistic</b> | <b>p-value</b> | <b>Adjusted p-value</b> |
|---------------------|--------------------|-----------------|-----------------------|------------------|----------------|-------------------------|
| s5                  | (Intercept)        | 1.16114215      | 0.58473805            | 1.98574755       | 0.04706136     | 0.14118409              |
| s5                  | diagnosis_exposure | 4.84957051      | 5.6784812             | 0.85402599       | 0.39309059     | 0.39309059              |
| s5                  | centered_AGE       | -0.5361215      | 0.4853387             | -1.1046336       | 0.26931837     | 0.39309059              |
| s1                  | (Intercept)        | 4.2003331       | 1.36910422            | 3.06794257       | 0.00215538     | 0.00646614              |
| s1                  | diagnosis_exposure | -7.698947       | 3.0920139             | -2.4899458       | 0.01277626     | 0.01916439              |
| s1                  | centered_AGE       | -1.1173441      | 0.66809127            | -1.6724422       | 0.09443715     | 0.09443715              |
| s2                  | (Intercept)        | -0.4280877      | 0.80787705            | -0.5298922       | 0.5961867      | 0.5961867               |
| s2                  | diagnosis_exposure | 51.7371557      | 23.7491136            | 2.17848786       | 0.02936974     | 0.08810921              |
| s2                  | centered_AGE       | -2.0850188      | 1.11917136            | -1.8630023       | 0.06246194     | 0.09369291              |
| s3                  | (Intercept)        | 1.34496518      | 0.66653014            | 2.01786101       | 0.04360574     | 0.13081722              |
| s3                  | diagnosis_exposure | 1.64792166      | 4.102203              | 0.40171626       | 0.68789285     | 0.68789285              |
| s3                  | centered_AGE       | -0.6022419      | 0.49284101            | -1.2219802       | 0.22171512     | 0.33257269              |
| s4                  | (Intercept)        | 0.81162853      | 0.64294595            | 1.26235888       | 0.20681968     | 0.20681968              |
| s4                  | diagnosis_exposure | 5.12356758      | 3.52869049            | 1.45197421       | 0.14650878     | 0.20681968              |
| s4                  | centered_AGE       | -0.9239388      | 0.55719803            | -1.6581874       | 0.09727964     | 0.20681968              |
| s6                  | (Intercept)        | 2.23199636      | 0.73610117            | 3.03218695       | 0.00242789     | 0.00728366              |
| s6                  | diagnosis_exposure | -6.127137       | 4.26538457            | -1.4364794       | 0.15086598     | 0.22629897              |
| s6                  | centered_AGE       | -0.4218361      | 0.52380542            | -0.8053297       | 0.42062943     | 0.42062943              |
| s7                  | (Intercept)        | 1.33605223      | 0.6670159             | 2.00302905       | 0.04517417     | 0.13552251              |
| s7                  | diagnosis_exposure | 1.75264219      | 4.16080913            | 0.42122629       | 0.67358985     | 0.67358985              |
| s7                  | centered_AGE       | -0.6779965      | 0.48600033            | -1.3950535       | 0.1629997      | 0.24449955              |

Supplementary Table 11 | Difference in CN signature exposures in paired primary-relapse BriTROC-1 samples

| CN signature | term                        | estimate   | Standard error | statistic  | p-value    | Adjusted p-value |
|--------------|-----------------------------|------------|----------------|------------|------------|------------------|
| s5           | (Intercept)                 | 0.05430768 | 0.04052521     | 1.34009625 | 0.18995445 | 0.65879573       |
| s5           | log(diagnosis_exposure + 1) | 0.16730291 | 0.17505777     | 0.95570112 | 0.34661719 | 0.65879573       |
| s5           | time_to_relapse             | 2.02E-05   | 2.34E-05       | 0.86205421 | 0.39527744 | 0.65879573       |
| s5           | centered_AGE                | 0.00966981 | 0.019155       | 0.5048193  | 0.61725574 | 0.72606165       |
| s5           | prior_lines_chemo           | -0.0069177 | 0.01956574     | -0.3535604 | 0.72606165 | 0.72606165       |
| s1           | (Intercept)                 | 0.09502383 | 0.05740794     | 1.65523845 | 0.10796682 | 0.19466625       |
| s1           | log(diagnosis_exposure + 1) | 0.71569037 | 0.14569089     | 4.91238923 | 2.76E-05   | 0.00013802       |
| s1           | time_to_relapse             | -4.53E-05  | 2.81E-05       | -1.6133674 | 0.11679975 | 0.19466625       |
| s1           | centered_AGE                | 0.00516766 | 0.02174027     | 0.23770004 | 0.8136778  | 0.91236298       |
| s1           | prior_lines_chemo           | -0.0025952 | 0.02338889     | -0.1109605 | 0.91236298 | 0.91236298       |
| s2           | (Intercept)                 | 0.04351759 | 0.03678519     | 1.18301922 | 0.24579521 | 0.46586727       |
| s2           | log(diagnosis_exposure + 1) | 0.52868796 | 0.1534013      | 3.44643736 | 0.00165369 | 0.00826847       |
| s2           | time_to_relapse             | -5.70E-06  | 1.90E-05       | -0.2994408 | 0.76660227 | 0.76660227       |
| s2           | centered_AGE                | -0.0160833 | 0.01461252     | -1.1006548 | 0.27952036 | 0.46586727       |
| s2           | prior_lines_chemo           | 0.01402005 | 0.01634427     | 0.85779596 | 0.39758877 | 0.49698596       |
| s3           | (Intercept)                 | 0.05831058 | 0.03392091     | 1.71901565 | 0.09558396 | 0.2389599        |
| s3           | log(diagnosis_exposure + 1) | 0.63254469 | 0.15185422     | 4.1654731  | 0.00023015 | 0.00115076       |
| s3           | time_to_relapse             | 1.87E-05   | 1.92E-05       | 0.97565791 | 0.33678656 | 0.4209832        |
| s3           | centered_AGE                | -0.0230171 | 0.01550174     | -1.4848055 | 0.14769389 | 0.24615648       |
| s3           | prior_lines_chemo           | -0.0122262 | 0.01645885     | -0.7428375 | 0.46317245 | 0.46317245       |
| s4           | (Intercept)                 | 0.02733762 | 0.04726737     | 0.57836142 | 0.56719848 | 0.88422905       |
| s4           | log(diagnosis_exposure + 1) | 0.54392473 | 0.14326478     | 3.79663949 | 0.0006407  | 0.00320348       |
| s4           | time_to_relapse             | 4.29E-05   | 2.27E-05       | 1.88660637 | 0.06861058 | 0.17152645       |
| s4           | centered_AGE                | 0.00678539 | 0.01791059     | 0.37884791 | 0.70738324 | 0.88422905       |
| s4           | prior_lines_chemo           | 0.00266658 | 0.01863326     | 0.14310867 | 0.88713053 | 0.88713053       |
| s6           | (Intercept)                 | 0.05950631 | 0.03368539     | 1.76653204 | 0.08715307 | 0.21788267       |
| s6           | log(diagnosis_exposure + 1) | 0.50029307 | 0.14794439     | 3.38162917 | 0.00196466 | 0.00982328       |
| s6           | time_to_relapse             | -2.14E-05  | 1.66E-05       | -1.2880421 | 0.20726324 | 0.34543874       |
| s6           | centered_AGE                | 0.01416556 | 0.01377867     | 1.02807887 | 0.31186806 | 0.38983508       |
| s6           | prior_lines_chemo           | -0.0035647 | 0.01367493     | -0.2606741 | 0.79606772 | 0.79606772       |
| s7           | (Intercept)                 | 0.03699964 | 0.0287341      | 1.28765635 | 0.20739585 | 0.51848964       |
| s7           | log(diagnosis_exposure + 1) | 0.62527933 | 0.13922491     | 4.49114533 | 9.18E-05   | 0.000459         |
| s7           | time_to_relapse             | -6.99E-06  | 1.73E-05       | -0.404366  | 0.68872001 | 0.68872001       |
| s7           | centered_AGE                | -0.0061395 | 0.01288602     | -0.476445  | 0.63709857 | 0.68872001       |
| s7           | prior_lines_chemo           | 0.01247864 | 0.01415476     | 0.88158612 | 0.38478526 | 0.64130877       |
